# Supplementary material for: Contributing factors to quality of life after vertebral artery dissection: a prospective comparative study
Source: Springer Nature journal article supplement (doi:10.1186/s12883-019-1541-x), 2019-12-01
Supplement: MOESM1 [file 17469042]

**Table 5** Pathological results of the neuropsychological test battery assessment

| Neuropsychological domain                      | Group D |       | Group I |       | Group M |       | Statistics     |       |
|------------------------------------------------|---------|-------|---------|-------|---------|-------|----------------|-------|
|                                                | n       | %     | n       | %     | n       | %     | X <sup>2</sup> | p     |
| <i>Attention / Executive function</i>          |         |       |         |       |         |       |                |       |
| Alertness, TAP <sup>a</sup>                    | 8/29    | 27.6% | 11/38   | 28.9% | 8/24    | 33.3% | 0.22           | 0.893 |
| Divided attention, TAP <sup>a</sup>            | 12/28   | 42.8% | 21/37   | 56.7% | 8/23    | 34.8% | 2.98           | 0.225 |
| Selective attention, TAP <sup>a</sup>          | 5/29    | 17.2% | 9/38    | 23.7% | 2/23    | 8.7%  | 2.21           | 0.331 |
| Trail Making Part A, TMT <sup>b</sup>          | 10/29   | 34.5% | 11/38   | 28.9% | 4/24    | 16.6% | 2.16           | 0.339 |
| Trail Making Part B, TMT <sup>b</sup>          | 9/28    | 32.1% | 11/38   | 28.9% | 4/24    | 16.6% | 1.75           | 0.415 |
| Tower of London, TvL <sup>c</sup>              | 3/29    | 10.3% | 6/38    | 15.8% | 4/24    | 16.6% | 0.54           | 0.759 |
| <i>Visuo-constructive functions</i>            |         |       |         |       |         |       |                |       |
| Mental rotation, LPS <sup>d</sup>              | 6/28    | 21.4% | 5/37    | 13.5% | 3/24    | 12.5% | 1.01           | 0.602 |
| Visual-spatial function, 5PT <sup>e</sup>      | 6/30    | 20.0% | 7/38    | 18.4% | 2/24    | 8.3%  | 1.54           | 0.462 |
| <i>Verbal fluency</i>                          |         |       |         |       |         |       |                |       |
| Phonematic, RWT <sup>f</sup>                   | 14/30   | 46.6% | 14/38   | 36.8% | 9/24    | 37.5% | 0.77           | 0.679 |
| Semantic, RWT <sup>f</sup>                     | 8/30    | 26.6% | 10/38   | 26.3% | 7/24    | 29.2% | 0.06           | 0.967 |
| <i>Learning / Memory</i>                       |         |       |         |       |         |       |                |       |
| Verbal learning/memory, VLMT <sup>g</sup>      | 17/30   | 56.6% | 22/38   | 57.9% | 12/24   | 50.0% | 0.39           | 0.819 |
| Visual digit span forward, BTT <sup>h</sup>    | 12/30   | 40.0% | 15/38   | 39.5% | 10/24   | 41.6% | 0.03           | 0.984 |
| Visual digit span backwards., BTT <sup>h</sup> | 12/30   | 40.0% | 17/36   | 47.2% | 7/24    | 29.2% | 1.51           | 0.469 |
| <i>Hand motor function</i>                     |         |       |         |       |         |       |                |       |
| Finger tapping right hand, FTT <sup>i</sup>    | 0/27    | 0%    | 0/38    | 0%    | 0/24    | 0%    |                |       |
| Finger tapping left hand, FTT <sup>i</sup>     | 1/27    | 3.7%  | 1/37    | 2.7%  | 0/24    | 0%    | 0.83           | 0.657 |
| Finger tapping both hands, FTT <sup>i</sup>    | 3/27    | 11.1% | 2/37    | 5.4%  | 0/24    | 0%    | 2.93           | 0.230 |

<sup>a</sup> Testbatterie zur Aufmerksamkeitsprüfung [22], <sup>b</sup> Trail Making Test [23], <sup>c</sup> Tower of London [24], <sup>d</sup> Leistungsprüfungssystem [25], <sup>e</sup> Five-Point-Test, <sup>f</sup> Regensburger Wortflüssigkeitstest [27], <sup>g</sup> Verbal Learning and Memory Test [28], <sup>h</sup> Block Tapping Test [29], <sup>i</sup> Finger Tapping Test [30]
